# Supplementary material
Source: Royal Society of Chemistry journal article supplement (doi:10.1039/d6fo01092j)
Supplement: d6fo01092j2.pdf [file d6fo01092j2.pdf]

**Table S1. LC-MS Analysis: Ion Pairs, Declustering Potential, and Collision Energy Settings <sup>a</sup>**

| Amino acid          | Q1 mass (Da) | Q3 mass (Da) | Retention (min) | DP<br>(volts) | CE (volts) |
|---------------------|--------------|--------------|-----------------|---------------|------------|
| Phe                 | 166.2        | 120.1        | 2.96            | 28            | 15         |
| Leu                 | 132.1        | 86.1         | 3.21            | 55            | 12         |
| Ile                 | 132.1        | 44.2         | 3.44            | 55            | 32         |
| Met                 | 150.1        | 56.1         | 3.77            | 46            | 20         |
| Val                 | 118.1        | 72.1         | 4.32            | 47            | 13         |
| Pro                 | 116.1        | 70.1         | 4.44            | 68            | 20         |
| Tyr                 | 182.1        | 91.1         | 4.27            | 59            | 35         |
| Ala                 | 90.1         | 44.1         | 5.22            | 48            | 11         |
| Thr                 | 120.1        | 56.1         | 5.37            | 120           | 37         |
| Cly                 | 76.0         | 30.1         | 5.71            | 52            | 11         |
| Glu                 | 148.1        | 84.1         | 6.23            | 24            | 19         |
| Asp                 | 134.0        | 88.1         | 7.76            | 60            | 19         |
| His                 | 156.1        | 110.0        | 7.89            | 42            | 19         |
| Arg                 | 175.1        | 70.0         | 8.30            | 41            | 25         |
| Lys                 | 147.1        | 84.1         | 8.85            | 50            | 21         |
| Trp                 | 205.1        | 188.1        | 3.16            | 80            | 12         |
| Leu-d3 <sup>a</sup> | 135.1        | 89.1         | 3.21            | 34            | 14         |
| Ala-d3 <sup>a</sup> | 93.1         | 47.2         | 5.22            | 25            | 11         |
| Lys-d4 <sup>a</sup> | 151.1        | 88.1         | 8.85            | 34            | 19         |

<sup>a</sup> isotopic internal standard

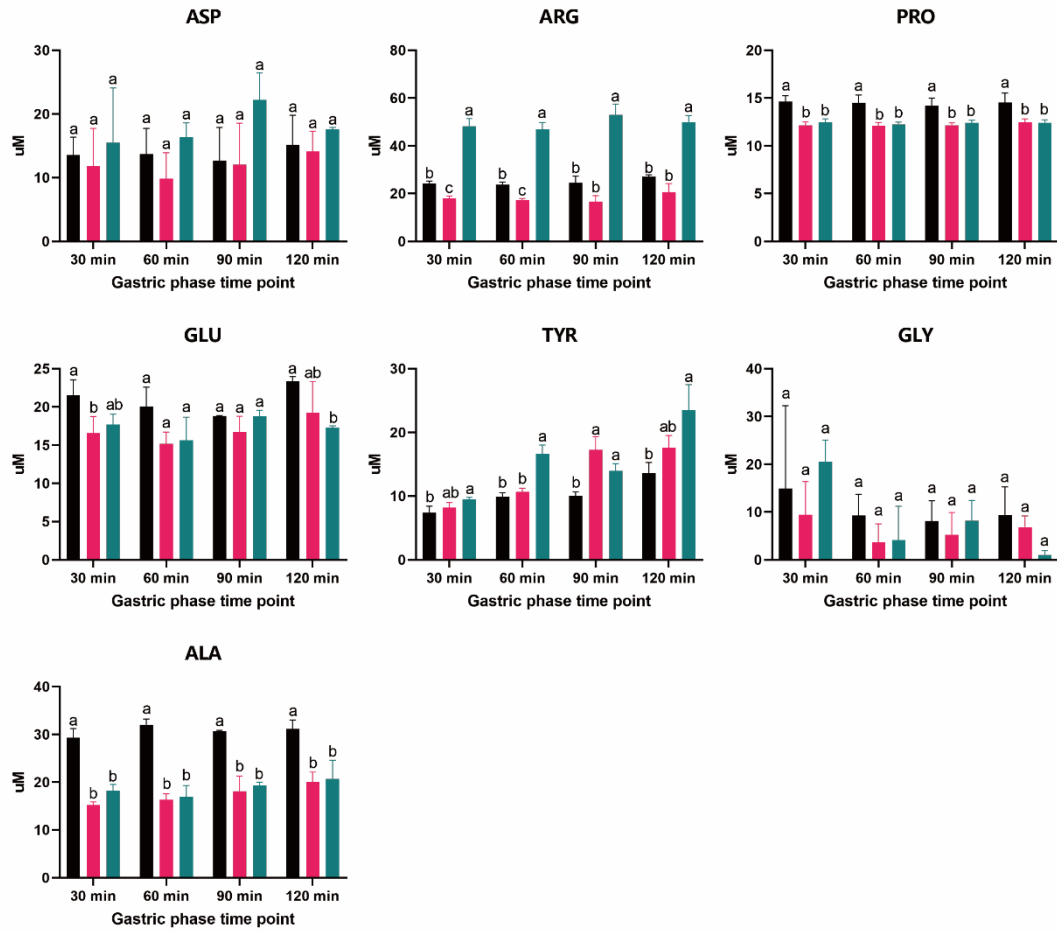

**Fig.S1.** Other dispensable amino acids release of YP, WPC and SP during the *in vitro* gastric phase. Error bars are SD of three individual experiments. Different letters (a-c) represent significant differences ( $P < 0.05$ ,  $n = 3$ ).

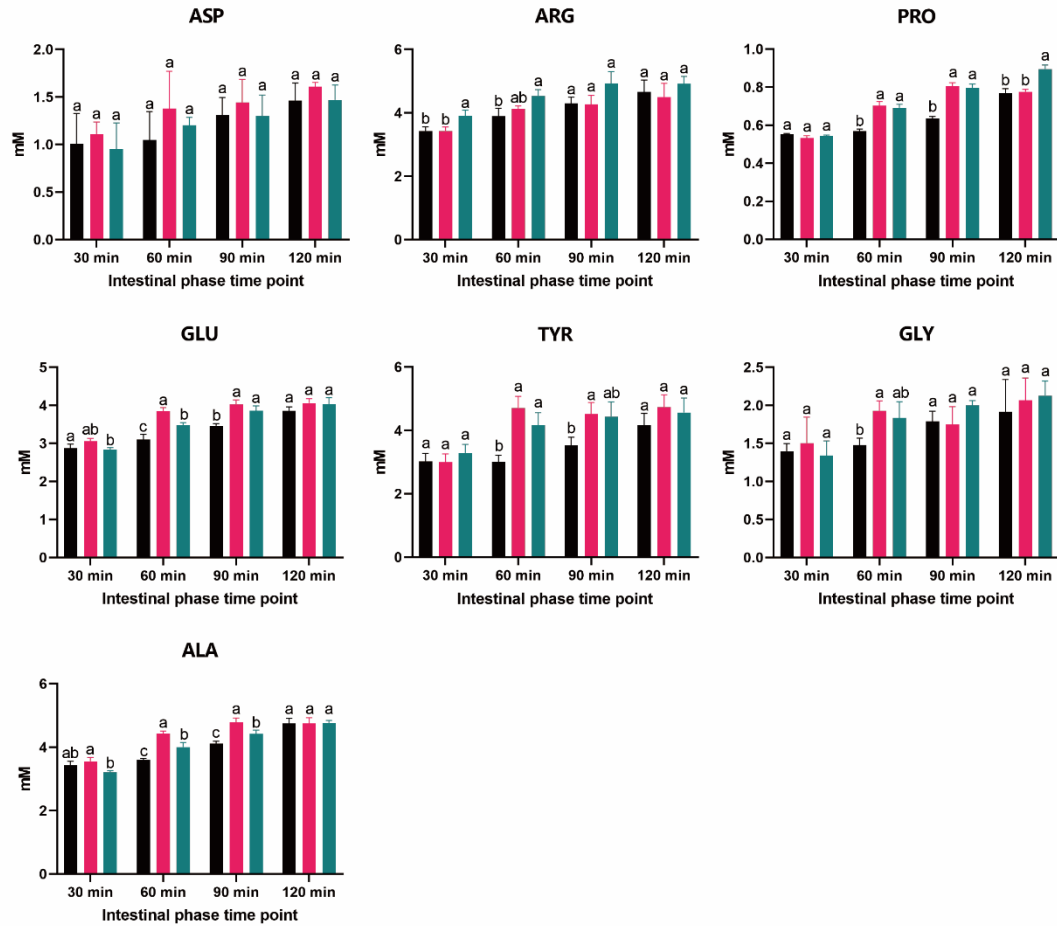

**Fig.S2.** Other dispensable amino acids release of YP, WPC and SP during the *in vitro* intestinal phase. Error bars are SD of three individual experiments. Different letters (a-c) represent significant differences ( $P < 0.05$ ,  $n = 3$ ).
